# Supplementary material
Source: Springer Nature journal article supplement (https://www.springermedizin.de/resource/supplementary/12889_2011_3485_MOESM6_ESM.pdf/9489160)

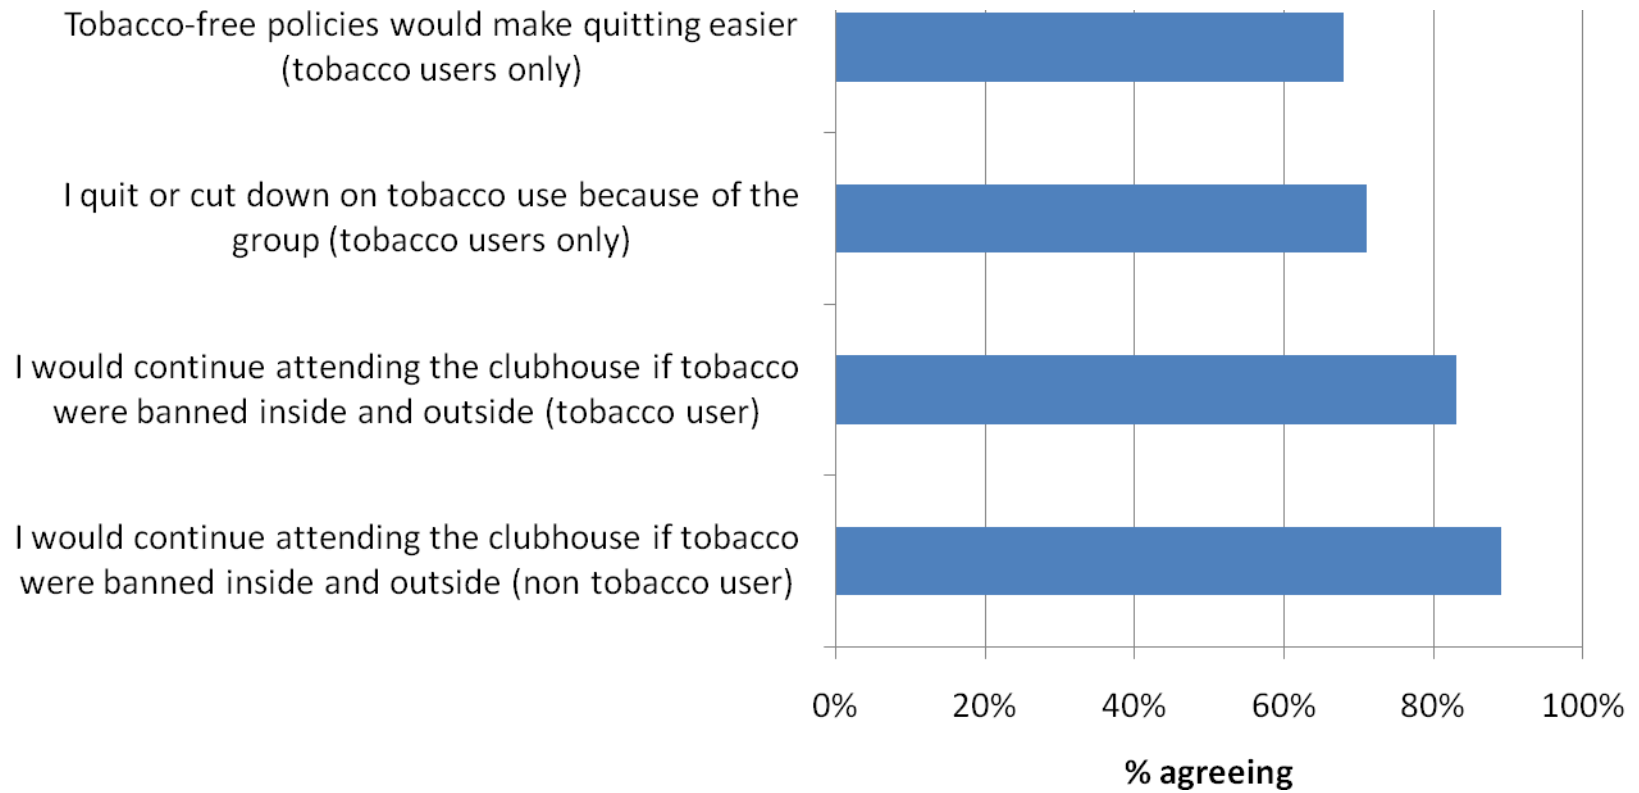

Supplement: MOESM6 [file 9489160]
